# Supplementary material
Source: Springer Nature journal article supplement (https://www.springermedizin.de/resource/supplementary/13024_2013_521_MOESM13_ESM.pdf/9644394)
Supplement: MOESM13 [file 9644394]

**A***GMR-GAL4*

BRI2-23 x2

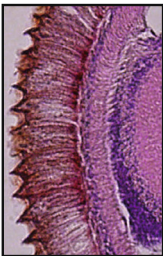A $\beta$ 42 x2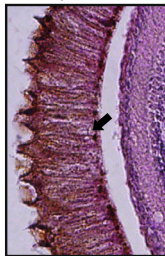

ABri x2

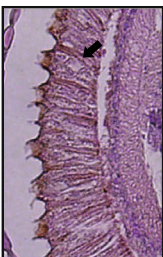

ADan x2

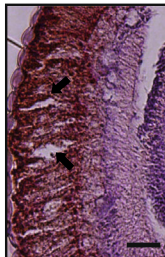**B***GMR-GAL4*A $\beta$ 42 x2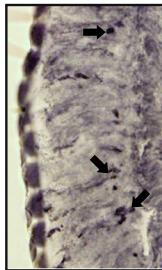

ABri x2

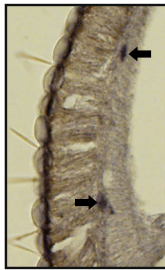

ADan x2

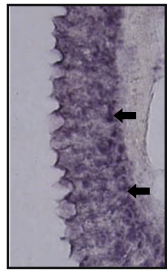

BRI2-23 x2

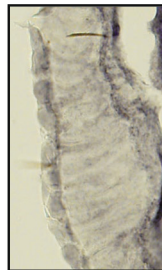

BRI2-23 x2

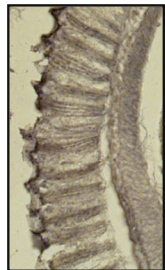

BRI2-23 x2

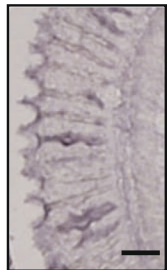anti-A $\beta$ 

anti-ABri

anti-ADan
